# Supplementary material
Source: Elsevier journal article supplement (https://www.sciencedirect.com/science/article/pii/S1413355521000320)
Supplement: mmc1 [file S1413355521000320:mmc1.docx]

**Supplemental online material I** Transformation of the SATIS-Stroke scale into the logit score of the Rasch model.

| Ordinal Scores (Raw Sum Scores) | Rasch Measures (logit) |
| --- | --- |
| 0 | -5.11 |
| 1 | -4.33 |
| 2 | -3.81 |
| 3 | -3.46 |
| 4 | -3.20 |
| 5 | -2.98 |
| 6 | -2.81 |
| 7 | -2.65 |
| 8 | -2.51 |
| 9 | -2.39 |
| 10 | -2.28 |
| 11 | -2.18 |
| 12 | -2.08 |
| 13 | -1.99 |
| 14 | -1.91 |
| 15 | -1.83 |
| 16 | -1.76 |
| 17 | -1.69 |
| 18 | -1.62 |
| 19 | -1.55 |
| 20 | -1.49 |
| 21 | -1.43 |
| 22 | -1.37 |
| 23 | -1.32 |
| 24 | -1.26 |
| 25 | -1.21 |
| 26 | -1.16 |
| 27 | -1.11 |
| 28 | -1.06 |
| 29 | -1.01 |
| 30 | -0.96 |
| 31 | -0.91 |
| 32 | -0.87 |
| 33 | -0.82 |
| 34 | -0.78 |
| 35 | -0.74 |
| 36 | -0.70 |
| 37 | -0.65 |
| 38 | -0.61 |
| 39 | -0.57 |
| 40 | -0.53 |
| 41 | -0.49 |
| 42 | -0.45 |
| 43 | -0.41 |
| 44 | -0.37 |
| 45 | -0.33 |
| 46 | -0.29 |
| 47 | -0.26 |
| 48 | -0.22 |
| 49 | -0.18 |
| 50 | -0.14 |
| 51 | -0.10 |
| 52 | -0.07 |
| 53 | -0.03 |
| 54 | 0.01 |
| 55 | 0.05 |
| 56 | 0.08 |
| 57 | 0.12 |
| 58 | 0.16 |
| 59 | 0.20 |
| 60 | 0.23 |
| 61 | 0.27 |
| 62 | 0.31 |
| 63 | 0.35 |
| 64 | 0.39 |
| 65 | 0.43 |
| 66 | 0.46 |
| 67 | 0.50 |
| 68 | 0.54 |
| 69 | 0.58 |
| 70 | 0.62 |
| 71 | 0.66 |
| 72 | 0.71 |
| 73 | 0.75 |
| 74 | 0.79 |
| 75 | 0.83 |
| 76 | 0.88 |
| 77 | 0.92 |
| 78 | 0.97 |
| 79 | 1.01 |
| 80 | 1.06 |
| 81 | 1.11 |
| 82 | 1.16 |
| 83 | 1.21 |
| 84 | 1.26 |
| 85 | 1.32 |
| 86 | 1.37 |
| 87 | 1.43 |
| 88 | 1.49 |
| 89 | 1.55 |
| 90 | 1.61 |
| 91 | 1.68 |
| 92 | 1.75 |
| 93 | 1.82 |
| 94 | 1.90 |
| 95 | 1.98 |
| 96 | 2.07 |
| 97 | 2.16 |
| 98 | 2.26 |
| 99 | 2.37 |
| 100 | 2.50 |
| 101 | 2.63 |
| 102 | 2.78 |
| 103 | 2.96 |
| 104 | 3.17 |
| 105 | 3.43 |
| 106 | 3.77 |
| 107 | 4.29 |
| 108 | 5.08 |

**Supplemental online material II**

Reliability and agreement of the 36 items of SATIS-Stroke (Brazilian version).

| SATIS-Stroke items (Brazilian version) | | Intra-observer  ICC2,1 (95% CI) | Inter-observer  ICC2,1 (95% CI) |
| --- | --- | --- | --- |
| 1. | Participating in food and drink preparation in all circumstances. | 0.79 (0.67, 0.87) | 0.89 (0.83, 0.93) |
| 2. | Using knife, fork and spoon in all circumstances. | 0.66 (0.46, 0.78) | 0.83 (0.74, 0.89) |
| 3. | Participating in spoken exchange of information with your entourage. | 0.73 (0.58, 0.82) | 0.85 (0.77, 0.90) |
| 4. | Washing your hair according to your needs. | 0.81 (0.71, 0.88) | 0.80 (0.68, 0.87) |
| 5. | Undressing to use the toilet and redressing in your home or outside of it. | 0.79 (0.68, 0.86) | 0.90 (0.84, 0.93) |
| 6. | Carrying out your personal hygiene according to your needs. | 0.84 (0.76, 0.90) | 0.88 (0.82, 0.92) |
| 7. | Having urinary continence in your home and outside of it. | 0.87 (0.79, 0.91) | 0.89 (0.84, 0.93) |
| 8. | Participating in arts and culture (cinema, theatre, etc.). | 0.69 (0.36, 0.85) | 0.75 (0.48, 0.87) |
| 9. | Helping others. | 0.68 (0.50, 0.79) | 0.81 (0.70, 0.87) |
| 10. | Reading and understanding a document in all circumstances. | 0.81 (0.70, 0.88) | 0.85 (0.76, 0.90) |
| 11. | Using the telephone at home according to your needs. | 0.72 (0.57, 0.82) | 0.78 (0.66, 0.86) |
| 12. | Listening to and watching television according to your needs. | 0.55 (0.29, 0.71) | 0.69 (0.52, 0.80) |
| 13. | Managing your income in all circumstances. | 0.74 (0.58, 0.83) | 0.82 (0.72, 0.88) |
| 14. | Using coins and banknotes in all circumstances. | 0.80 (0.69, 0.87) | 0.85 (0.78, 0.91) |
| 15. | Dressing and undressing in all circumstances and according to your needs. | 0.83 (0.74, 0.89) | 0.88 (0.81, 0.92) |
| 16. | Ensuring that your rights are respected. | 0.78 (0.66, 0.86) | 0.85 (0.78, 0.91) |
| 17. | Participating in spousal relationship. | 0.82 (0.70, 0.89) | 0.82 (0.69, 0.89) |
| 18. | Taking a bath or your shower according to your needs. | 0.87 (0.79, 0.91) | 0.89 (0.83, 0.93) |
| 19. | Reaching objects in your near space. | 0.81 (0.70, 0.88) | 0.76 (0.63, 0.84) |
| 20. | Getting clothes out of the closet. | 0.89 (0.83, 0.93) | 0.83 (0.73, 0.89) |
| 21. | To supplement administrative documents in all circumstances. | 0.73 (0.57, 0.82) | 0.84 (0.76, 0.90) |
| 22. | Moving inside your home. | 0.83 (0.74, 0.89) | 0.92 (0.89, 0.95) |
| 23. | Moving outside your home in any circumstances. | 0.81 (0.70, 0.87) | 0.79 (0.68, 0.87) |
| 24. | Climbing and going downstairs all stages in your home according to your needs. | 0.82 (0.72, 0.88) | 0.81 (0.70, 0.88) |
| 25. | Entering and exiting your home according to your needs. | 0.81 (0.70, 0.88) | 0.84 (0.75, 0.89) |
| 26. | Opening and closing doors in your home. | 0.86 (0.78, 0.91) | 0.84 (0.75, 0.89) |
| 27. | Using storage spaces in your house for foods, beverages, clothes and other objects necessary to your day-to-day living. | 0.74 (0.60, 0.84) | 0.83 (0.73, 0.89) |
| 28. | Choosing appropriate clothes. | 0.77 (0.64, 0.85) | 0.68 (0.51, 0.79) |
| 29. | Getting feelings across. | 0.77 (0.64, 0.85) | 0.78 (0.66, 0.86) |
| 30. | **Being aware of what surrounds you.** | **0.39 (0.5, 0.61)** | 0.65 (0.45, 0.77) |
| 31. | Expressing oneself to someone. | 0.74 (0.59, 0.83) | 0.82 (0.72, 0.88) |
| 32. | Participating in ceremonies (marriage, family gathering, etc.). | 0.67 (0.48, 0.80) | 0.84 (0.75, 0.90) |
| 33. | Asking for help in an emergency situation. | 0.63 (0.42, 0.76) | 0.73 (0.58, 0.82) |
| 34. | Managing your pain in all circumstances. | 0.63 (0.42, 0.76) | 0.71 (0.55, 0.81) |
| 35. | Maintaining emotional relationships. | 0.79 (0.66, 0.87) | 0.84 (0.75, 0.90) |
| 36. | Having a sexual relationship with somebody. | 0.84 (0.73, 0.91) | 0.91 (0.85, 0.95) |

ICC2,1, intraclass correlation coefficient; CI, confidence interval. *p < 0.001 for all ICCs.

**Supplemental online material III**

Diagnostic accuracy of cut-off point on ROC curve (≤ 0.08) to categorize individuals according to score obtained on gold standard measure (SS-QOL).

| Variable |  | Without limitations and restrictions to activity and participation  (SS-QOL >80 points) | With limitations and restrictions to activity and participation  (SS-QOL <80 points) |
| --- | --- | --- | --- |
| SATIS ≤0.08 (score logits) | No  Yes | 41 (85.4%)  **7 (14.5%)*** | **9 (28.2%)****  23 (71.9%) |
| Total |  | 48 | 32 |

* False negative. ** False positive.
